# Supplementary material for: Epidermal ADAM17 maintains the skin barrier by regulating EGFR ligand–dependent terminal keratinocyte differentiation
Source: PubMed Central journal article supplement — J Exp Med. 2012 Jun 4;209(6):1105–19. doi: 10.1084/jem.20112258 (PMC3371728; doi:10.1084/jem.20112258), 2012-06-04
Supplement: supp_jem.20112258_JEM_20112258_sm.pdf [file supp_jem.20112258_JEM_20112258_sm.pdf]

## SUPPLEMENTAL MATERIAL

Franzke et al., <http://www.jem.org/cgi/content/full/jem.20112258/DC1>**Table S1.** Primer sequences used for quantitative RT-PCR analysis

| Gene name        | Primer sequence                      |                                   |
|------------------|--------------------------------------|-----------------------------------|
|                  | Forward                              | Reverse                           |
| <i>Il1f6</i>     | 5'-ACAAAGGATGGGGAGCAGCCTGT-3'        | 5'-CCAGGGAAGGCTGCAGACTCAAAT-3'    |
| <i>Il1f8</i>     | 5'-GGAGGGCAAACCAACTTTGCAGC-3'        | 5'-ACAGAAGTGAGCCCTCATGCCA-3'      |
| <i>Il1f5</i>     | 5'-GAGGACTGCACGCAGAGAAGGT-3'         | 5'-GGCACTGGCTTCTCCTTGAACG-3'      |
| <i>Il1a</i>      | 5'-TCATTGGCGCTTGAGTCGGCA-3'          | 5'-TCAGAGAGAGATGGTCAATGGCAGA-3'   |
| <i>Il1b</i>      | 5'-AAAAAGCCTCGTGCTGCGGACC-3'         | 5'-TGAGGCCCAAGGCCACAGGTA-3'       |
| <i>Il1ra</i>     | 5'-TGTTCTGGGCATCCACGGGG-3'           | 5'-AAAGCTGGTGGTGGGGCCTTTC-3'      |
| <i>Il18</i>      | 5'-TGCCATGTCAGAAGACTCTTGCGT-3'       | 5'-CGGTTGTACAGTGAAGTCGGCCA-3'     |
| <i>Il18bp</i>    | 5'-TGGAAGCTGGCAAACGGACTG-3'          | 5'-TGAGGTGCAGATGTGGCTCTGGC-3'     |
| <i>Tgfa</i>      | 5'-GCGCTGGGTATCCTGTTAGC-3'           | 5'-TGGGAATCTGGGCACCTTGT-3'        |
| <i>Areg</i>      | 5'-CATCGGCATCGTTATCACAG-3'           | 5'-ACAGTCCCGTTTTCTGTGCG-3'        |
| <i>Hbegf</i>     | 5'-ATCCACGGGAGTGCCAGATA-3'           | 5'-GAGTCAGCCCATGACACCTG-3'        |
| <i>Ereg</i>      | 5'-CCTGCCTCTTGGGTCTTGACG-3'          | 5'-TGCACTTGAGCCACACGGGG-3'        |
| <i>Egfr</i>      | 5'-CGGGACACCCAATCAGAAAA-3'           | 5'-CAGCCTCCGAGGAGCATAA-3'         |
| <i>Adam17</i>    | 5'-CAGCAGCACTCCATAAGGAAA-3'          | 5'-TTTGTAAGCGTTCGGTA-3'           |
| <i>Krt14</i>     | 5'-CCCAATTCTCCTCATCCTCTC-3'          | 5'-TAGGGACAATACAGGGGCTCT-3'       |
| <i>Krt1</i>      | 5'-GACACCACAACCCGGACCCAAAACCTAGAC-3' | 5'-ATACTGGGCCTTGACTCCGAGATGATG-3' |
| <i>Lor</i>       | 5'-AACAGTATCAGTGCCAGAGC-3'           | 5'-TCTGACTGGTCTGCTGAGAG-3'        |
| <i>Tgm1</i>      | 5'-GCGGAGGGCTGTGGAGAAGG-3'           | 5'-GGGTGCGCAAACGGAAGGTG-3'        |
| <i>Tgm3</i>      | 5'-ACAGTGCTGCGGTGCTTGGG-3'           | 5'-GGGGCCTAGGTGAGTCCGCA-3'        |
| <i>Ccl2</i>      | 5'-CGGCTGGAGCATCCACGTGT-3'           | 5'-TTCTTTGGGACACCTGCTGCTGG-3'     |
| <i>Cxcl1</i>     | 5'-CCCACTGCACCCAAACCGAAG-3'          | 5'-CAGGTGCCATCAGAGCAGTCTGT-3'     |
| <i>Tnfa</i>      | 5'-AGCCCCAGTCTGTATCCTT-3'            | 5'-ACAGTCCAGTCACTGTCCC-3'         |
| <i>Serpina3a</i> | 5'-CTGGGTCCCAATATCAGACAGGAGC-3'      | 5'-AGTGTGCCTCCAGTTGCC-3'          |
| <i>Serpina3n</i> | 5'-GCTGGCAGCTGGCTGTTTTCAG-3'         | 5'-TCCCAACGTGCCATCTGGGAAG-3'      |
| <i>Gapdh</i>     | 5'-TGGAGAACCTGCCAAGTATG-3'           | 5'-GTTGAAGTCGACAGGAGACAAC-3'      |
